# Supplementary material for: Structural characterization of protein transport by the Type 9 Secretion System
Source: Research Square preprint supplement (doi:10.21203/rs.3.rs-3514469/v1), 2023-11-16
Supplement: Supplementary file 1 [file a489a982fecc8af20f23d44e.xlsx]

## Sheet: Sheet1
Table S#number. Proteomics analysis of purified SprA complexes from Peak I (or I') and Peak II, related to Figure 1b, Figure 4g, and Figure S2a.
Type of search	MS/MS Ion Search
Enzyme	Trypsin
Fixed modifications	Carbamidomethyl (C)
Variable modifications	Oxidation (M)
Mass values	Monoisotopic
Protein mass	Unrestricted
Peptide mass tolerance	20 ppm
Fragment mass tolerance	0.1 Da
Max missed cleavages	1
Instrument type	ESI-QUAD-TOF
Significance threshold p<	0.05
Max. number of families	AUTO
Ions score or expect cut-off	-1
Column	Description
Mass	Molecular weight (Dalton)
Num. of matches	Number of peptides matches
Score	Score from Mascot
emPAI	Exponentially modified protein abundance index
Highlighted	Remark
Yellow shading	Extended translocon components
Green shading	T9SS substrate proteins
Gray shading	Other T9SS and gliding associated components
SprA complexes purified from ΔgldL - Peak I
Uniprot Accession	Description	Gene	Score	Mass	Num. of matches	emPAI
Q5I6C7	SprA	Fjoh_1653	12309	270038	305	11.57
A1E5T9	SprE	Fjoh_1051	3016	101126	104	13.72
A5FJA2	SkpA	Fjoh_1689	1747	39550	47	19.15
A5FJM7	PorV	Fjoh_1555	1511	44203	37	8.57
A5FLT3	RemZ	Fjoh_0803	1239	113597	35	1.32
A5FMY7	SusC-like TonB-dependent receptor	Fjoh_0403	913	117174	27	1.88
A5F9W9	PPI	Fjoh_4997	575	19250	13	4.56
A5FC34	TonB-dependent siderophore receptor	Fjoh_4221	543	87720	15	1.26
A5FE93	PorD	Fjoh_3466	423	33295	11	2.12
A5FAQ0	NucA	Fjoh_4723	354	66216	10	1.05
A5FM39	OmpA/MotB domain protein	Fjoh_0697	306	51823	9	1.28
A5FMX2	RagB/SusD domain protein	Fjoh_0404	208	54407	7	0.84
A5FIV1	60 kDa chaperonin	Fjoh_1842	201	57137	8	0.95
A5FHT8	Leucine dehydrogenase	Fjoh_2201	151	43179	5	0.73
A5FAF5	SusC-like TonB-dependent receptor	Fjoh_4814	131	120192	5	0.22
A5FLU4	FspB	Fjoh_0798	115	96368	3	0.16
A5FIS8	GldK	Fjoh_1853	75	52806	2	0.20
A5FIJ9	Elongation factor	Fjoh_1936	70	43138	2	0.25
A5FMX3	Hypothetical lipoprotein	Fjoh_0405	66	28448	4	0.95
A5FL74	Band 7 protein	Fjoh_1007	62	36755	2	0.29
A5FAM0	Acyl-CoA dehydrogenase domain protein	Fjoh_4756	54	66708	2	0.15
A5FND0	Heat shock protein Hsp90	Fjoh_0260	53	70978	2	0.14
A5FJF2	4Fe-4S ferredoxin, iron-sulfur binding domain protein	Fjoh_1635	52	111457	2	0.09
A5FMP1	TonB family protein	Fjoh_0490	52	29422	1	0.17
A5FL31	ATP synthase subunit c	Fjoh_1056	51	6253	1	1.08
A5FJ36	Plug	Fjoh_1759	45	48647	2	0.22
A5FEQ4	Uncharacterized protein	Fjoh_3297	44	52973	1	0.09
A5FKI1	Dihydrolipoyllysine-residue succinyltransferase component of 2-oxoglutarate dehydrogenase complex	Fjoh_1255	44	43981	2	0.24
A5FGR7	ATPase AAA-2 domain protein	Fjoh_2583	42	95811	3	0.16
A5FKI2	2-oxoglutarate dehydrogenase, E1 subunit	Fjoh_1256	41	104943	2	0.10
A5FL34	ATP synthase subunit alpha	Fjoh_1059	39	56592	2	0.18
A5FHG1	Fused isobutyryl-CoA mutase	Fjoh_2332	37	128496	1	0.04
A5FG81	30S ribosomal protein S1	Fjoh_2762	30	66088	1	0.07
A5FE28	Uncharacterized protein	Fjoh_3532	25	93868	1	0.05
A5FNN8	Histone family protein DNA-binding protein	Fjoh_0139	23	9194	1	0.65
A5FAL5	Transcriptional regulator-like protein	Fjoh_4751	23	40768	1	0.12
A5FI98	Na+/solute symporter	Fjoh_2033	23	70554	1	0.07
A5FLA2	Protein Fjoh_0988	Fjoh_0988	22	36313	1	0.14
A5FB31	Mammalian cell entry related domain protein	Fjoh_4584	22	35198	1	0.14
A5FCU2	TonB-dependent receptor	Fjoh_3970	22	89755	1	0.05
A5FJF3	Polysulphide reductase, NrfD	Fjoh_1636	21	53309	1	0.09
A5FNF1	Hydrolase or acyltransferase (Alpha/beta hydrolase superfamily)-like protein	Fjoh_0235	19	32850	1	0.16
A5FD34	Candidate bifunctional acetylxylan esterase/feruloyl esterase Carbohydrate esterase family 1/carbohydrate esterase family 6	Fjoh_3878	19	63061	1	0.08
A5FKF0	Hydrolase, TatD family	Fjoh_1278	19	29793	1	0.17
A5FK49	Uncharacterized protein	Fjoh_1381	19	19255	1	0.28
A5FGR6	SSU ribosomal protein S6P modification protein	Fjoh_2582	18	50412	2	0.10
A5FJF6	UspA domain protein	Fjoh_1627	18	30570	1	0.17
A5FD96	Uncharacterized protein	Fjoh_3818	18	31038	1	0.16
A5FL18	All-trans-retinol 13,14-reductase	Fjoh_1077	17	58265	1	0.09
A5FKE7	Uncharacterized protein	Fjoh_1292	17	5318	1	1.33
A5FAF6	RagB/SusD domain protein	Fjoh_4815	16	64835	1	0.08
A5FJN7	Dihydrolipoamide acetyltransferase component of pyruvate dehydrogenase complex	Fjoh_1552	14	56828	1	0.09
SprA complexes purified from ΔgldL - Peak II
Uniprot Accession	Description	Gene	Score	Mass	Num. of matches	emPAI
Q5I6C7	SprA	Fjoh_1653	14530	270038	374	9.52
A5FJM7	PorV	Fjoh_1555	1819	44203	49	8.71
A1E5T9	SprE	Fjoh_1051	932	101126	30	2.61
A5FMY7	SusC-like TonB-dependent receptor	Fjoh_0403	720	117174	25	1.79
A5F9W9	PPI	Fjoh_4997	595	19250	13	4.62
A5FLU4	FspB	Fjoh_0798	513	96368	17	1.11
A5FJ36	Plug	Fjoh_1759	499	48647	14	1.95
A5FLT3	RemZ	Fjoh_0803	433	113597	11	0.46
A5FAQ0	NucA	Fjoh_4723	337	66216	10	0.92
A5FJA2	SkpA	Fjoh_1689	255	39550	7	1.33
A5FM39	OmpA/MotB domain protein	Fjoh_0697	192	51823	6	0.74
A5FMX2	RagB/SusD domain protein	Fjoh_0404	143	54407	5	0.55
A5FE93	PorD	Fjoh_3466	71	33295	2	0.33
A5FL31	ATP synthase subunit c	Fjoh_1056	67	6253	1	1.08
A5FMX3	Hypothetical lipoprotein	Fjoh_0405	53	28448	3	0.65
A5FJF2	4Fe-4S ferredoxin, iron-sulfur binding domain protein	Fjoh_1635	42	111457	2	0.09
A5FJE3	Cytochrome C oxidase subunit II, transmembrane region	Fjoh_1640	29	44372	1	0.11
A5FIN9	Candidate beta-glycosyltransferase Glycosyltransferase family 2	Fjoh_1898	23	47814	1	0.11
A5FJF3	Polysulphide reductase, NrfD	Fjoh_1636	21	53309	1	0.09
A5FB67	SusC-like TonB-dependent receptor	Fjoh_4559	20	109270	1	0.04
A5FKU8	3-oxoacyl-[acyl-carrier-protein] synthase 2	Fjoh_1138	19	46282	1	0.11
A5FJE2	Uncharacterized protein	Fjoh_1639	19	53012	1	0.09
A5FB66	RagB/SusD domain protein	Fjoh_4558	18	58232	1	0.09
A5FND4	Hypothetical lipoprotein	Fjoh_0248	18	21781	1	0.24
A5FJF1	Cytochrome c, class I	Fjoh_1634	17	48830	1	0.10
A5FMP1	TonB family protein	Fjoh_0490	17	29422	1	0.18
A5FB33	Organic solvent tolerance protein OstA-like protein	Fjoh_4586	17	104315	1	0.05
A5FIY3	UDP-N-acetylglucosamine--N-acetylmuramyl-(pentapeptide) pyrophosphoryl-undecaprenol N-acetylglucosamine transferase	Fjoh_1810	17	40080	1	0.13
A5FCJ0	Candidate beta-glycosidase Glycoside hydrolase family 2	Fjoh_4075	16	134331	1	0.04
A5FCE3	Extracellular solute-binding protein, family 1	Fjoh_4125	15	47120	1	0.11
SprA complexes purified from ΔgldL ΔsprE - Peak I'
Uniprot Accession	Description	Gene	Score	Mass	Num. of matches	emPAI
Q5I6C7	SprA	Fjoh_1653	15350	270038	374	10.21
A5FLT3	RemZ	Fjoh_0803	2719	113597	60	1.73
A5FJM7	PorV	Fjoh_1555	2010	44203	52	10.77
A5FMY7	SusC-like TonB-dependent receptor	Fjoh_0403	1203	117174	27	1.99
A5F9W9	PPI	Fjoh_4997	719	19250	17	4.53
A5FIV1	60 kDa chaperonin	Fjoh_1842	465	57137	13	1.71
A5FC34	TonB-dependent siderophore receptor	Fjoh_4221	391	87720	11	0.82
A5FM39	OmpA/MotB domain protein	Fjoh_0697	377	51823	11	1.08
A5FMX2	RagB/SusD domain protein	Fjoh_0404	236	54407	10	1.39
A5FLU4	FspB	Fjoh_0798	210	96368	7	0.41
A5FAQ0	NucA	Fjoh_4723	202	66216	6	0.43
A5FIJ9	Elongation factor	Fjoh_1936	185	43138	5	0.73
A5FJA2	SkpA	Fjoh_1689	172	39550	4	0.61
A5FKI1	Dihydrolipoyllysine-residue succinyltransferase component of 2-oxoglutarate dehydrogenase complex	Fjoh_1255	159	43981	5	0.71
A5FL34	ATP synthase subunit alpha	Fjoh_1059	133	56592	6	0.65
A5FAF5	SusC-like TonB-dependent receptor	Fjoh_4814	96	120192	5	0.22
A5FB31	Mammalian cell entry related domain protein	Fjoh_4584	77	35198	3	0.50
A5FL31	ATP synthase subunit c	Fjoh_1056	74	6253	1	1.08
A5FMP1	TonB family protein	Fjoh_0490	71	29422	4	0.90
A5FHT8	Leucine dehydrogenase	Fjoh_2201	70	43179	4	0.55
A5FMX3	Hypothetical lipoprotein	Fjoh_0405	69	28448	3	0.65
A5FGA3	DUF2807 domain-containing protein	Fjoh_2749	65	25214	1	0.21
A5FJN7	Dihydrolipoamide acetyltransferase component of pyruvate dehydrogenase complex	Fjoh_1552	65	56828	1	0.09
A5FFS2	OmpA/MotB domain protein	Fjoh_2921	64	30645	1	0.17
A5FLA2	Protein Fjoh_0988	Fjoh_0988	60	36313	2	0.30
A5FKI2	2-oxoglutarate dehydrogenase, E1 subunit	Fjoh_1256	54	104943	1	0.05
A5FG81	30S ribosomal protein S1	Fjoh_2762	53	66088	2	0.15
A5FJF2	4Fe-4S ferredoxin, iron-sulfur binding domain protein	Fjoh_1635	47	111457	3	0.14
A5FL74	Band 7 protein	Fjoh_1007	45	36755	1	0.14
A5FJE2	Uncharacterized protein	Fjoh_1639	44	53012	1	0.09
A5FA21	RagB/SusD domain protein	Fjoh_4950	43	58895	2	0.17
A5FJF5	Hypothetical lipoprotein	Fjoh_1638	40	20445	1	0.26
A5FJD2	Cytochrome c oxidase, subunit III	Fjoh_1660	38	37293	2	0.29
A5FGR7	ATPase AAA-2 domain protein	Fjoh_2583	34	95811	1	0.05
A5FJF1	Cytochrome c, class I	Fjoh_1634	33	48830	2	0.21
A5FJF3	Polysulphide reductase, NrfD	Fjoh_1636	31	53309	1	0.09
A5FIP6	LemA family protein	Fjoh_1891	28	21614	1	0.24
A5FA22	SusC-like TonB-dependent receptor	Fjoh_4951	28	115605	1	0.04
A5FAF6	RagB/SusD domain protein	Fjoh_4815	27	64835	1	0.08
A5FBJ9	Heat shock protein Hsp20	Fjoh_4413	27	17500	1	0.31
A5FMY3	Elongation factor G	Fjoh_0399	25	79359	1	0.06
A5FLR4	Biosynthetic peptidoglycan transglycosylase	Fjoh_0829	25	75350	1	0.07
A5FFH6	Uncharacterized protein	Fjoh_3020	22	44619	1	0.11
A5FJ45	Malate synthase	Fjoh_1738	22	62604	1	0.08
A5FKY3	Histidine ammonia-lyase	Fjoh_1109	22	56784	1	0.09
A5FAQ6	Ribosomal large subunit pseudouridine synthase D	Fjoh_4712	22	25829	1	0.20
A5FCI8	Uncharacterized protein	Fjoh_4073	20	46996	1	0.11
A5FIJ2	50S ribosomal protein L7/L12	Fjoh_1942	20	12658	1	0.44
A5FK63	Uncharacterized protein	Fjoh_1378	19	38376	1	0.13
A5FHZ7	Cytochrome c biogenesis protein, transmembrane region	Fjoh_2139	19	76822	1	0.06
A5FDB2	SusC-like TonB-dependent receptor	Fjoh_3802	17	135717	1	0.04
SprA complexes purified from ΔgldL ΔsprE - Peak II
Uniprot Accession	Description	Gene	Score	Mass	Num. of matches	emPAI
Q5I6C7	SprA	Fjoh_1653	14943	270038	385	9.20
A5FJM7	PorV	Fjoh_1555	1824	44203	46	6.85
A5FMY7	SusC-like TonB-dependent receptor	Fjoh_0403	1698	117174	43	3.57
A5FLT3	RemZ	Fjoh_0803	710	113597	17	0.66
A5F9W9	PPI	Fjoh_4997	654	19250	18	4.63
A5FLU4	FspB	Fjoh_0798	595	96368	22	1.58
A5FJF2	4Fe-4S ferredoxin, iron-sulfur binding domain protein	Fjoh_1635	557	111457	16	0.91
A5FJ36	Plug	Fjoh_1759	532	48647	12	1.68
A5FAQ0	NucA	Fjoh_4723	456	66216	11	0.92
A5FAP8	Endonuclease I	Fjoh_4721	153	67319	4	0.24
A5FB67	SusC-like TonB-dependent receptor	Fjoh_4559	377	109270	9	0.49
A5FMX2	RagB/SusD domain protein	Fjoh_0404	316	54407	11	1.42
A5FM39	OmpA/MotB domain protein	Fjoh_0697	205	51823	6	0.74
A5FMX3	Hypothetical lipoprotein	Fjoh_0405	196	28448	6	1.74
A5FB66	RagB/SusD domain protein	Fjoh_4558	180	58232	5	0.51
A5FJA2	SkpA	Fjoh_1689	148	39550	6	0.83
A5FM33	Glutamate dehydrogenase	Fjoh_0708	135	49356	7	0.97
A5FL31	ATP synthase subunit c	Fjoh_1056	89	6253	1	1.08
A5FJ30	Delta-1-pyrroline-5-carboxylate dehydrogenase	Fjoh_1753	83	59750	3	0.27
A5FFS2	OmpA/MotB domain protein	Fjoh_2921	82	30645	1	0.17
A5FM52	Succinate dehydrogenase or fumarate reductase, flavoprotein subunit	Fjoh_0676	74	74090	3	0.22
A5FHP4	Multifunctional fusion protein	Fjoh_2256	71	108430	4	0.19
A5FJF1	Cytochrome c, class I	Fjoh_1634	70	48830	2	0.22
A5FK18	Peptidylprolyl isomerase	Fjoh_1415	68	75740	3	0.21
A5FIV1	60 kDa chaperonin	Fjoh_1842	64	57137	2	0.18
A5FJE2	Uncharacterized protein	Fjoh_1639	63	53012	3	0.31
A5FEV4	Leucine-rich repeat-containing protein, typical subtype	Fjoh_3247	54	256292	4	0.08
A5FG81	30S ribosomal protein S1	Fjoh_2762	45	66088	1	0.08
A5FJF3	Polysulphide reductase, NrfD	Fjoh_1636	44	53309	1	0.09
A5FJE3	Cytochrome C oxidase subunit II, transmembrane region	Fjoh_1640	33	44372	1	0.11
A5FL34	ATP synthase subunit alpha	Fjoh_1059	33	56592	2	0.18
A5FIJ9	Elongation factor	Fjoh_1936	30	43138	1	0.12
A5FIT0	GldM	Fjoh_1855	29	54812	1	0.09
A5FP13	Alanine dehydrogenase	Fjoh_0022	28	40096	1	0.13
A5FL50	Uncharacterized protein	Fjoh_1042	28	9063	1	0.67
A5FJW6	Putative K(+)-stimulated pyrophosphate-energized sodium pump	Fjoh_1479	26	89130	1	0.06
A5FEW4	Extradiol ring-cleavage dioxygenase, class III enzyme, subunit B	Fjoh_3243	22	33024	1	0.16
A5FN11	Citrate synthase	Fjoh_0367	22	47653	1	0.11
A5FIY3	UDP-N-acetylglucosamine--N-acetylmuramyl-(pentapeptide) pyrophosphoryl-undecaprenol N-acetylglucosamine transferase	Fjoh_1810	20	40080	1	0.13
A5FJ03	Uncharacterized protein	Fjoh_1779	19	53502	1	0.09
A5F9W8	Hypothetical lipoprotein	Fjoh_5006	19	28721	1	0.18
A5FJD2	Cytochrome c oxidase, subunit III	Fjoh_1660	18	37293	1	0.14
SprA complexes purified from ΔgldL ΔskpA - Peak I'
Uniprot Accession	Description	Gene	Score	Mass	Num. of matches	emPAI
Q5I6C7	SprA	Fjoh_1653	19175	270038	469	16.73
A5FLT3	RemZ	Fjoh_0803	2878	113597	68	1.51
A5FJM7	PorV	Fjoh_1555	1883	44203	47	12.10
A1E5T9	SprE	Fjoh_1051	1281	101126	44	4.97
A5FMY7	SusC-like TonB-dependent receptor	Fjoh_0403	969	117174	24	1.65
A5F9W9	PPI	Fjoh_4997	538	19250	14	4.53
A5FC34	TonB-dependent siderophore receptor	Fjoh_4221	462	87720	11	0.82
A5FM39	OmpA/MotB domain protein	Fjoh_0697	368	51823	11	1.73
A5FIV1	60 kDa chaperonin	Fjoh_1842	303	57137	9	1.11
A5FAQ0	NucA	Fjoh_4723	259	66216	9	0.91
A5FE93	PorD	Fjoh_3466	231	33295	8	1.70
A5FMX2	RagB/SusD domain protein	Fjoh_0404	138	54407	5	0.55
A5FLU4	FspB	Fjoh_0798	119	96368	5	0.28
A5FGR7	ATPase AAA-2 domain protein	Fjoh_2583	89	95811	2	0.10
A5FJF2	4Fe-4S ferredoxin, iron-sulfur binding domain protein	Fjoh_1635	83	111457	3	0.14
A5FIJ9	Elongation factor	Fjoh_1936	77	43138	4	0.55
A5FAF5	SusC-like TonB-dependent receptor	Fjoh_4814	69	120192	3	0.13
A5FL74	Band 7 protein	Fjoh_1007	66	36755	1	0.14
A5FL31	ATP synthase subunit c	Fjoh_1056	63	6253	1	1.08
A5FG81	30S ribosomal protein S1	Fjoh_2762	62	66088	2	0.15
A5FLQ7	Glutamine--fructose-6-phosphate aminotransferase [isomerizing]	Fjoh_0822	58	68216	1	0.07
A5FLA2	Protein Fjoh_0988	Fjoh_0988	56	36313	2	0.30
A5FA22	SusC-like TonB-dependent receptor	Fjoh_4951	54	115605	2	0.09
A5FL34	ATP synthase subunit alpha	Fjoh_1059	47	56592	1	0.09
A5FHT8	Leucine dehydrogenase	Fjoh_2201	47	43179	2	0.25
A5FKI2	2-oxoglutarate dehydrogenase, E1 subunit	Fjoh_1256	46	104943	1	0.05
A5FKI1	Dihydrolipoyllysine-residue succinyltransferase component of 2-oxoglutarate dehydrogenase complex	Fjoh_1255	39	43981	2	0.24
A5FJN7	Dihydrolipoamide acetyltransferase component of pyruvate dehydrogenase complex	Fjoh_1552	39	56828	2	0.18
A5FEV4	Leucine-rich repeat-containing protein, typical subtype	Fjoh_3247	37	256292	1	0.02
A5FMP1	TonB family protein	Fjoh_0490	34	29422	2	0.38
A5FB31	Mammalian cell entry related domain protein	Fjoh_4584	32	35198	1	0.14
A5FMX3	Hypothetical lipoprotein	Fjoh_0405	31	28448	1	0.18
A5FJF3	Polysulphide reductase, NrfD	Fjoh_1636	28	53309	1	0.09
A5FNV3	Periplasmic binding protein	Fjoh_0083	25	42761	1	0.12
A5FE37	2-dehydro-3-deoxyphosphooctonate aldolase	Fjoh_3513	24	31266	1	0.16
A5FII8	Aconitase	Fjoh_1952	20	82824	1	0.06
A5FM19	Hypothetical lipoprotein	Fjoh_0711	19	28950	1	0.18
A5FL55	Uncharacterized protein	Fjoh_1028	18	64854	1	0.08
A5FJY2	Acetyl-coenzyme A carboxylase carboxyl transferase subunit beta	Fjoh_1462	18	31677	1	0.16
A5FFS2	OmpA/MotB domain protein	Fjoh_2921	18	30645	1	0.17
A5FIY3	UDP-N-acetylglucosamine--N-acetylmuramyl-(pentapeptide) pyrophosphoryl-undecaprenol N-acetylglucosamine transferase	Fjoh_1810	17	40080	1	0.13
A5FM02	Succinylglutamate desuccinylase/aspartoacylase	Fjoh_0725	17	36454	1	0.14
A5FE87	DNA ligase	Fjoh_3475	16	75957	1	0.06
A5FFH6	Uncharacterized protein	Fjoh_3020	15	44619	1	0.11
A5FFL1	Uncharacterized protein	Fjoh_2983	15	8217	1	0.75
SprA complexes purified from ΔgldL ΔskpA - Peak II
Uniprot Accession	Description	Gene	Score	Mass	Num. of matches	emPAI
Q5I6C7	SprA	Fjoh_1653	23411	270038	562	24.83
A5FJM7	PorV	Fjoh_1555	2596	44203	64	13.85
A5FMY7	SusC-like TonB-dependent receptor	Fjoh_0403	1039	117174	34	2.70
A5FLU4	FspB	Fjoh_0798	1027	96368	24	1.98
A1E5T9	SprE	Fjoh_1051	925	101126	34	3.34
A5FAQ0	NucA	Fjoh_4723	746	66216	20	2.17
A5F9W9	PPI	Fjoh_4997	658	19250	18	6.15
A5FLT3	RemZ	Fjoh_0803	583	113597	15	0.73
A5FE93	PorD	Fjoh_3466	340	33295	9	2.62
A5FJ36	Plug	Fjoh_1759	298	48647	7	0.99
A5FMX2	RagB/SusD domain protein	Fjoh_0404	213	54407	8	1.02
A5FM39	OmpA/MotB domain protein	Fjoh_0697	182	51823	4	0.45
A5FMX3	Hypothetical lipoprotein	Fjoh_0405	111	28448	4	0.95
A5FC34	TonB-dependent siderophore receptor	Fjoh_4221	88	87720	2	0.12
A5FB67	SusC-like TonB-dependent receptor	Fjoh_4559	63	109270	3	0.14
A5FB66	RagB/SusD domain protein	Fjoh_4558	62	58232	2	0.18
A5FJF2	4Fe-4S ferredoxin, iron-sulfur binding domain protein	Fjoh_1635	45	111457	2	0.09
A5FJF3	Polysulphide reductase, NrfD	Fjoh_1636	42	53309	1	0.09
A5FFS2	OmpA/MotB domain protein	Fjoh_2921	28	30645	1	0.17
A5FGI9	Alcohol dehydrogenase GroES domain protein	Fjoh_2657	25	42476	1	0.12
A5FL34	ATP synthase subunit alpha	Fjoh_1059	25	56592	1	0.09
A5F9S6	DUF2007 domain-containing protein	Fjoh_5043	23	7858	1	0.79
A5FNF1	Hydrolase or acyltransferase (Alpha/beta hydrolase superfamily)-like protein	Fjoh_0235	21	32850	1	0.16
A5FLH7	4Fe-4S ferredoxin, iron-sulfur binding domain protein	Fjoh_0902	21	8749	1	0.69
A5FKK7	NADH-quinone oxidoreductase subunit N	Fjoh_1233	20	50298	1	0.10
A5FJN3	AsmA family protein	Fjoh_1548	19	102967	1	0.05
A5FJE3	Cytochrome C oxidase subunit II, transmembrane region	Fjoh_1640	17	44372	1	0.11
A5FE87	DNA ligase	Fjoh_3475	17	75957	1	0.07
A5FFA3	Uncharacterized protein	Fjoh_3094	15	27986	1	0.18
SprA complexes purified from ΔgldL sprAΔnterm - Peak I'
Uniprot Accession	Description	Gene	Score	Mass	Num. of matches	emPAI
Q5I6C7	SprA	Fjoh_1653	18444	270038	447	12.49
A5FLT3	RemZ	Fjoh_0803	3042	113597	65	1.74
A1E5T9	SprE	Fjoh_1051	2485	101126	89	12.39
A5FJM7	PorV	Fjoh_1555	1954	44203	51	9.65
A5FMY7	SusC-like TonB-dependent receptor	Fjoh_0403	1441	117174	43	3.89
A5FC34	TonB-dependent siderophore receptor	Fjoh_4221	796	87720	18	1.66
A5F9W9	PPI	Fjoh_4997	698	19250	16	6.10
A5FJF2	4Fe-4S ferredoxin, iron-sulfur binding domain protein	Fjoh_1635	681	111457	22	1.35
A5FE93	PorD	Fjoh_3466	599	33295	19	4.52
A5FM39	OmpA/MotB domain protein	Fjoh_0697	578	51823	15	2.61
A5FAQ0	NucA	Fjoh_4723	547	66216	11	1.20
A1E5U4	SprD	Fjoh_0980	501	168340	15	0.49
A5FMX2	RagB/SusD domain protein	Fjoh_0404	429	54407	13	2.12
A5FIV1	60 kDa chaperonin	Fjoh_1842	351	57137	12	1.72
A5FJ36	Plug	Fjoh_1759	279	48647	6	0.80
A5FHT8	Leucine dehydrogenase	Fjoh_2201	263	43179	7	1.16
A5FLA7	SprF	Fjoh_0978	246	38800	5	0.84
A5FAM0	Acyl-CoA dehydrogenase domain protein	Fjoh_4756	217	66708	7	0.65
A5FIJ9	Elongation factor Fjoh_1936	Fjoh_1936	201	43138	8	1.41
A5FL34	ATP synthase subunit alpha	Fjoh_1059	194	56592	8	0.96
A5FG81	30S ribosomal protein S1	Fjoh_2762	169	66088	6	0.54
A5FMX3	Hypothetical lipoprotein	Fjoh_0405	146	28448	6	1.72
A5FAF5	SusC-like TonB-dependent receptor	Fjoh_4814	146	120192	4	0.17
A5FJF1	Cytochrome c, class I	Fjoh_1634	131	48830	3	0.34
A5FKI1	Dihydrolipoyllysine-residue succinyltransferase component of 2-oxoglutarate dehydrogenase complex	Fjoh_1255	129	43981	5	0.72
A5FGA3	DUF2807 domain-containing protein	Fjoh_2749	123	25214	2	0.46
A5FKI2	2-oxoglutarate dehydrogenase, E1 subunit	Fjoh_1256	121	104943	5	0.26
A5FJN7	Dihydrolipoamide acetyltransferase component of pyruvate dehydrogenase complex	Fjoh_1552	117	56828	5	0.52
A5FLS1	ATP synthase subunit beta	Fjoh_0819	110	54292	5	0.55
A5FGR7	ATPase AAA-2 domain protein	Fjoh_2583	106	95811	5	0.28
A5FND0	Heat shock protein Hsp90	Fjoh_0260	104	70978	3	0.22
A5FEQ4	Uncharacterized protein	Fjoh_3297	102	52973	3	0.31
A5FKE5	Acyl-CoA dehydrogenase domain protein	Fjoh_1290	100	43744	4	0.54
A5FLQ7	Glutamine--fructose-6-phosphate aminotransferase [isomerizing]	Fjoh_0822	90	68216	2	0.15
A5FMP1	TonB family protein	Fjoh_0490	89	29422	4	0.90
A5FJB8	PorP/SprF familly	Fjoh_1677	87	37748	3	0.46
A5FL74	Band 7 protein	Fjoh_1007	77	36755	1	0.14
A5FL31	ATP synthase subunit c	Fjoh_1056	77	6253	1	1.08
A5FAL7	3-hydroxyacyl-CoA dehydrogenase, NAD-binding	Fjoh_4753	68	88400	3	0.18
A5FGN4	ATP-dependent zinc metalloprotease FtsH	Fjoh_2600	68	70787	2	0.14
A5FB31	Mammalian cell entry related domain protein	Fjoh_4584	66	35198	2	0.31
A5FNN8	Histone family protein DNA-binding protein	Fjoh_0139	62	9194	2	1.73
A5FIP6	LemA family protein	Fjoh_1891	61	21614	1	0.24
A5FJE2	Uncharacterized protein	Fjoh_1639	60	53012	2	0.20
A5FIS8	GldK	Fjoh_1853	56	52806	2	0.20
A5FB66	RagB/SusD domain protein	Fjoh_4558	56	58232	1	0.09
A5FMY1	50S ribosomal protein L3	Fjoh_0397	53	22229	1	0.24
A5FLA2	Protein Fjoh_0988 Fjoh_0988	Fjoh_0988	50	36313	3	0.48
A5FJE3	Cytochrome C oxidase subunit II, transmembrane region	Fjoh_1640	45	44372	2	0.24
A5FJF6	UspA domain protein	Fjoh_1627	45	30570	2	0.36
A5FEQ3	Uncharacterized protein	Fjoh_3296	42	65191	1	0.08
A5FAF6	RagB/SusD domain protein	Fjoh_4815	41	64835	2	0.16
A5FMY5	30S ribosomal protein S12	Fjoh_0401	40	14196	1	0.39
A5FL50	Uncharacterized protein	Fjoh_1042	40	9063	1	0.66
A5FIJ3	DNA-directed RNA polymerase subunit beta	Fjoh_1943	39	142823	2	0.07
A5FFS2	OmpA/MotB domain protein	Fjoh_2921	35	30645	1	0.17
A5FB24	Glyceraldehyde-3-phosphate dehydrogenase	Fjoh_4590	32	36136	2	0.30
A5FIJ4	DNA-directed RNA polymerase subunit beta'	Fjoh_1944	31	160770	2	0.06
A5FN05	50S ribosomal protein L18	Fjoh_0381	31	12629	1	0.45
A5F9Z0	50S ribosomal protein L33	Fjoh_4982	29	6971	1	0.92
A5FMZ4	30S ribosomal protein S3	Fjoh_0391	29	27817	1	0.19
A5FFT5	ABC transporter related	Fjoh_2916	28	63632	1	0.08
A5FJD2	Cytochrome c oxidase, subunit III	Fjoh_1660	26	37293	2	0.29
A5FII8	Aconitase	Fjoh_1952	25	82824	1	0.06
A5FHG1	Fused isobutyryl-CoA mutase	Fjoh_2332	25	128496	1	0.04
A5FM87	Biotin carboxylase	Fjoh_0644	25	50086	1	0.10
A5FGL1	Chaperone protein DnaK	Fjoh_2631	24	67410	2	0.15
A5FFH6	Uncharacterized protein	Fjoh_3020	24	44619	1	0.11
A5FJF3	Polysulphide reductase, NrfD	Fjoh_1636	23	53309	1	0.09
A5FFM7	Aldehyde dehydrogenase	Fjoh_2967	22	55071	1	0.09
A5FMY3	Elongation factor G	Fjoh_0399	22	79359	1	0.06
A5FHV5	50S ribosomal protein L19	Fjoh_2182	20	13326	1	0.42
A5FB67	SusC-like TonB-dependent receptor	Fjoh_4559	20	109270	1	0.04
A5FHX8	Succinate--CoA ligase [ADP-forming] subunit beta	Fjoh_2162	20	43153	2	0.25
A5FFU1	Multifunctional fusion protein	Fjoh_2903	20	51841	1	0.10
A5FHE2	Glutamine synthetase, catalytic region	Fjoh_2345	20	82396	1	0.06
A5FJF4	Uncharacterized protein	Fjoh_1637	20	19802	1	0.27
A5FNM5	Methionine aminopeptidase	Fjoh_0158	20	28210	1	0.18
A5FE87	DNA ligase	Fjoh_3475	20	75957	1	0.06
A5FGV7	MazG family protein	Fjoh_2534	19	30118	1	0.17
A5F9W6	Protein translocase subunit SecA	Fjoh_504	19	126673	1	0.04
A5FH14	DNA topoisomerase (ATP-hydrolyzing)	Fjoh_2475	19	103492	1	0.05
A5FJR6	OMP_b-brl domain-containing protein	Fjoh_1517	17	21256	1	0.25
A5FA22	SusC-like TonB-dependent receptor	Fjoh_4951	15	115605	1	0.04
A5FJE4	Cytochrome-c oxidase	Fjoh_1641	14	67185	1	0.07
SprA complexes purified from ΔgldL sprAΔnterm - Peak II
Uniprot Accession	Description	Gene	Score	Mass	Num. of matches	emPAI
Q5I6C7	SprA	Fjoh_1653	19628	270038	501	13.84
A5FJM7	PorV	Fjoh_1555	2139	44203	56	9.71
A1E5T9	SprE	Fjoh_1051	1947	101126	67	8.68
A5F9W9	PPI	Fjoh_4997	1089	19250	25	6.13
A5FMY7	SusC-like TonB-dependent receptor	Fjoh_0403	1081	117174	31	2.40
A5FJ36	Plug	Fjoh_1759	1002	48647	28	4.29
A5FLA7	SprF	Fjoh_0978	992	38800	25	4.55
A5FAQ0	NucA	Fjoh_4723	601	66216	13	1.37
A5FLT3	RemZ	Fjoh_0803	422	113597	9	0.46
A5FE93	PorD	Fjoh_3466	322	33295	8	2.13
A5FJB8	PorP/SprF familly	Fjoh_1677	291	37748	8	1.42
A5FE72	PorP/SprF familly	Fjoh_3477	254	35240	8	1.57
A5FMX2	RagB/SusD domain protein	Fjoh_0404	212	54407	9	1.20
A5FM39	OmpA/MotB domain protein	Fjoh_0697	210	51823	7	0.90
A5FLU4	FspB	Fjoh_0798	199	96368	9	0.56
A5FB67	SusC-like TonB-dependent receptor	Fjoh_4559	197	109270	8	0.42
A5FB66	RagB/SusD domain protein	Fjoh_4558	142	58232	4	0.39
A5FMX3	Hypothetical lipoprotein	Fjoh_0405	134	28448	5	1.30
A5FJF2	4Fe-4S ferredoxin, iron-sulfur binding domain protein	Fjoh_1635	115	111457	6	0.29
A5FAM8	PorP/SprF familly	Fjoh_4749	93	38143	2	0.28
A1E5U4	SprD	Fjoh_0980	80	168340	3	0.09
A5FFS2	OmpA/MotB domain protein	Fjoh_2921	66	30645	1	0.17
A5FJE2	Uncharacterized protein	Fjoh_1639	62	53012	2	0.20
A5FJD2	Cytochrome c oxidase, subunit III	Fjoh_1660	45	37293	2	0.29
A5FM33	Glutamate dehydrogenase	Fjoh_0708	42	49356	2	0.21
A5FJF1	Cytochrome c, class I	Fjoh_1634	33	48830	1	0.10
A5FJF3	Polysulphide reductase, NrfD	Fjoh_1636	32	53309	1	0.09
A5FHT8	Leucine dehydrogenase	Fjoh_2201	30	43179	1	0.12
A5FJE3	Cytochrome C oxidase subunit II, transmembrane region	Fjoh_1640	29	44372	1	0.11
A5FFN4	LVIVD repeat protein	Fjoh_2960	29	57051	1	0.09
A5FJF5	Hypothetical lipoprotein	Fjoh_1638	27	20445	1	0.26
A5FD46	SusC-like TonB-dependent receptor	Fjoh_3863	22	114285	1	0.04
A5FIC0	Uncharacterized protein	Fjoh_2016	20	60833	1	0.08
A5FMP1	TonB family protein	Fjoh_0490	20	29422	1	0.17
A5FNZ1	YdjC family protein	Fjoh_0046	19	35310	1	0.14
A5FKA1	Uncharacterized protein	Fjoh_1329	19	92002	1	0.05
A5FJ30	Delta-1-pyrroline-5-carboxylate dehydrogenase	Fjoh_1753	18	59750	1	0.08
A5FFM7	Aldehyde dehydrogenase	Fjoh_2967	18	55071	1	0.09
A5FN11	Citrate synthase	Fjoh_0367	18	47653	1	0.11
A5FCE8	Beta_helix domain-containing protein	Fjoh_4114	13	94685	1	0.05
SprA complexes purified from ΔsprE - Peak I'
Uniprot Accession	Description	Gene	Score	Mass	Num. of matches	emPAI
Q5I6C7	SprA	Fjoh_1653	2102	270038	45	0.40
A5FLT3	RemZ	Fjoh_0803	258	113597	4	0.09
A5FIV1	60 kDa chaperonin	Fjoh_1842	255	57137	3	0.29
A5FGW1	Cytochrome c, class I	Fjoh_2538	220	35611	3	0.50
A5FC34	TonB-dependent siderophore receptor	Fjoh_4221	218	87720	3	0.18
A5FJM7	PorV	Fjoh_1555	177	44203	3	0.24
A5FIS9	GldL	Fjoh_1854	175	22752	2	0.52
A5FMY7	SusC-like TonB-dependent receptor	Fjoh_0403	169	117174	3	0.13
A5FM39	OmpA/MotB domain protein	Fjoh_0697	145	51823	2	0.20
A5FMP1	TonB family protein	Fjoh_0490	130	29422	3	0.63
A5FIP6	LemA family protein	Fjoh_1891	127	21614	2	0.55
A5FAF5	SusC-like TonB-dependent receptor	Fjoh_4814	125	120192	2	0.08
A5FJF2	4Fe-4S ferredoxin, iron-sulfur binding domain protein	Fjoh_1635	123	111457	2	0.09
A5FB31	Mammalian cell entry related domain protein	Fjoh_4584	110	35198	2	0.31
A5FMX2	RagB/SusD domain protein	Fjoh_0404	110	54407	2	0.19
A5FLS1	ATP synthase subunit beta	Fjoh_0819	87	54292	1	0.09
A5FKE5	Acyl-CoA dehydrogenase domain protein	Fjoh_1290	84	43744	2	0.24
A5FAQ0	NucA	Fjoh_4723	73	66216	2	0.16
A5FL34	ATP synthase subunit alpha	Fjoh_1059	66	56592	1	0.09
A5FG81	30S ribosomal protein S1	Fjoh_2762	58	66088	1	0.08
A5FND0	Heat shock protein Hsp90	Fjoh_0260	57	70978	1	0.07
A5F9W9	PPI	Fjoh_4997	57	19250	1	0.28
A5FIT0	GldM	Fjoh_1855	52	54812	1	0.09
A5FGW0	Cytochrome c oxidase, cbb3-type, subunit I	Fjoh_2537	49	82792	1	0.06
A5FLU4	FspB	Fjoh_0798	46	96368	1	0.05
A5FJ36	Plug	Fjoh_1759	40	48647	1	0.10
A5FHT8	Leucine dehydrogenase	Fjoh_2201	39	43179	1	0.12
A5FIJ9	Elongation factor Fjoh_1936	Fjoh_1936	35	43138	1	0.12
A5FKI1	Dihydrolipoyllysine-residue succinyltransferase component of 2-oxoglutarate dehydrogenase complex	Fjoh_1255	34	43981	1	0.12
A5FMM1	Ribonucleoside-diphosphate reductase	Fjoh_0522	19	37863	1	0.13
A5FC09	Candidate polygalacturonase Glycoside hydrolase family 28	Fjoh_4256	19	53453	1	0.09
A5FI41	TonB-dependent receptor	Fjoh_2098	16	91455	1	0.05
A5FL97	Uncharacterized protein	Fjoh_0983	16	47689	1	0.11
A5FN87	Candidate alpha-glycosyltransferase Glycosyltransferase family 4	Fjoh_0299	13	44455	1	0.11
SprA complexes purified from ΔsprE - Peak II
Uniprot Accession	Description	Gene	Score	Mass	Num. of matches	emPAI
Q5I6C7	SprA	Fjoh_1653	4756	270038	95	0.80
A5FMY7	SusC-like TonB-dependent receptor	Fjoh_0403	789	117174	16	0.78
A5FAQ0	NucA	Fjoh_4723	574	66216	10	0.54
A5FJM7	PorD	Fjoh_1555	522	44203	11	0.38
A5FLU4	FspB	Fjoh_0798	461	96368	9	0.35
A5FJ36	Plug	Fjoh_1759	388	48647	7	0.64
A5FJF2	4Fe-4S ferredoxin, iron-sulfur binding domain protein	Fjoh_1635	325	111457	6	0.24
A5FMX2	RagB/SusD domain protein	Fjoh_0404	306	54407	9	0.70
A5FIS9	GldL	Fjoh_1854	262	22752	4	0.87
A5F9W9	PPI	Fjoh_4997	220	19250	3	0.64
A5FM39	OmpA/MotB domain protein	Fjoh_0697	175	51823	3	0.32
A5FIT0	GldM	Fjoh_1855	124	54812	3	0.30
A5FLT3	RemZ	Fjoh_0803	123	113597	2	0.09
A5FC34	TonB-dependent siderophore receptor	Fjoh_4221	114	87720	2	0.12
A5FGW1	Cytochrome c, class I	Fjoh_2538	112	35611	2	0.31
A5FMX3	Hypothetical lipoprotein	Fjoh_0405	107	28448	2	0.40
A5FL50	Uncharacterized protein	Fjoh_1042	105	9063	1	0.67
A5FJD2	Cytochrome c oxidase, subunit III	Fjoh_1660	87	37293	1	0.14
A5FGW0	Cytochrome c oxidase, cbb3-type, subunit I	Fjoh_2537	64	82792	1	0.06
A5FEV4	Leucine-rich repeat-containing protein, typical subtype	Fjoh_3247	64	256292	1	0.02
A5FIV1	60 kDa chaperonin	Fjoh_1842	60	57137	2	0.18
A5FLS1	ATP synthase subunit beta	Fjoh_0819	52	54292	1	0.09
A5FJE2	Uncharacterized protein	Fjoh_1639	51	53012	1	0.09
A5FHP4	Multifunctional fusion protein	Fjoh_2256	48	108430	1	0.05
A5FNN8	Histone family protein DNA-binding protein	Fjoh_0139	46	9194	1	0.66
A5FM33	Glutamate dehydrogenase	Fjoh_0708	39	49356	1	0.10
A5FGR7	ATPase AAA-2 domain protein	Fjoh_2583	39	95811	1	0.05
A5FMP1	TonB family protein	Fjoh_0490	23	29422	1	0.18
